# Supplementary material for: Sodium tanshinone IIA silate increases melanin synthesis by activating the MAPK and PKA pathways and protects melanocytes from H2O2-induced oxidative stress
Source: Royal Society of Chemistry journal article supplement (doi:10.1039/c8ra09786k), 2019-01-01
Supplement: c8ra09786k1.pdf [file c8ra09786k1.pdf]

1 **Supplementary material**

2 **Part1**

3 **The synthetic procedure of Sodium Tanshinone IIA Silate (STS)**

4 To a stirred glacial acetic acid and acetic anhydride solution (1:1V/V) of  
5 Tanshinone IIA (1kg), vitriol (1L) was added and the temperature was below  
6 35°C. The reaction mixture was stirred at 35~40°C for 1 hours. Afterwards, the  
7 mixture solution was dropped into petroleum ether and NaCl was added. The red solid  
8 was filtered and the filter cake was washed by dichloromethane to give Sodium  
9 Tanshinone IIA Silate (1.09kg, yield:81.36%).

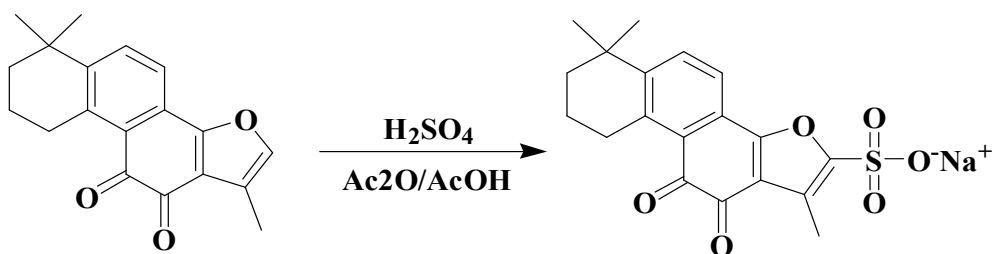

12 **Fig. S1.** The reaction equation of Sodium Tanshinone IIA Silate.

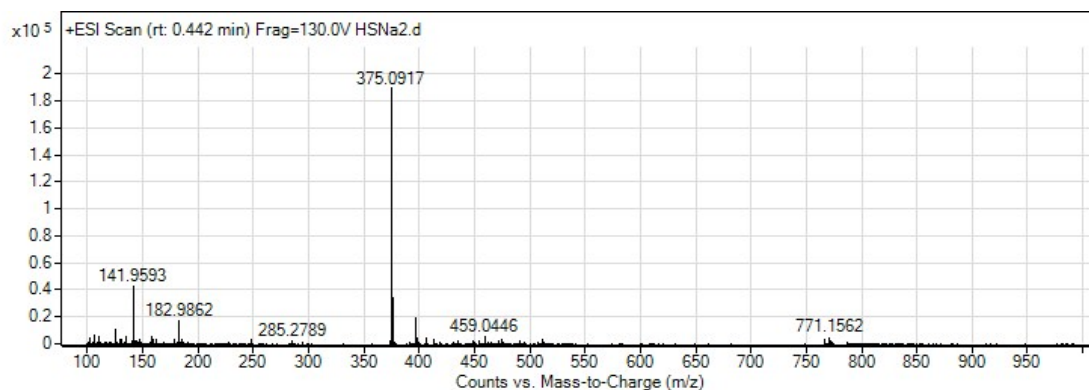

14 **Fig.S2.** Spectrogram of Sodium Tanshinone IIA Silate.

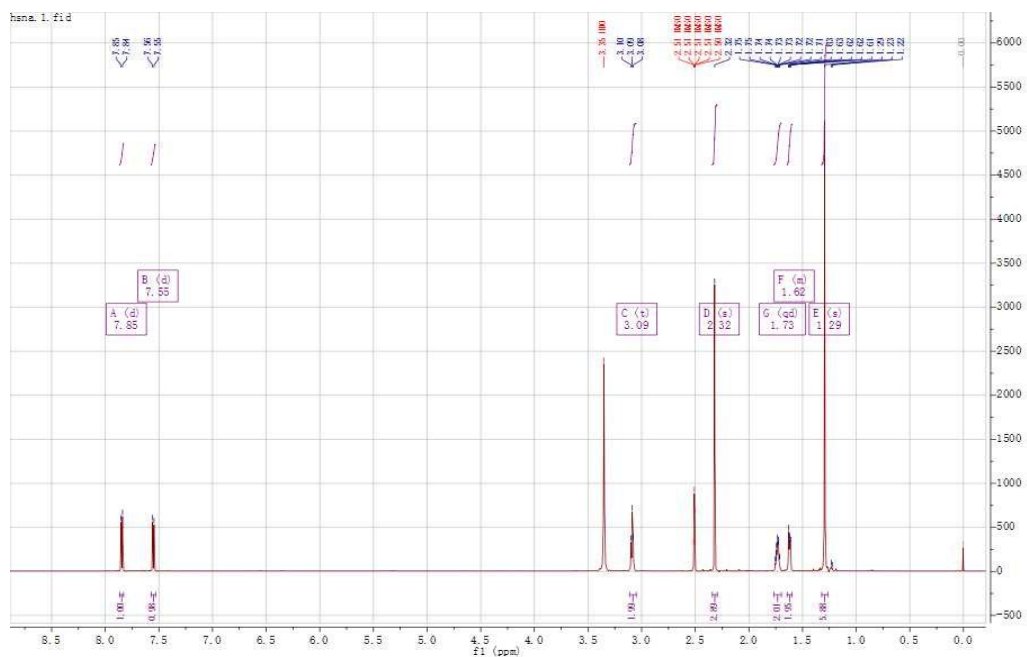

15

16 **Fig.S3.**  $^1\text{H}$  NMR spectral data of Sodium Tanshinone IIA Silate.

17

18

19

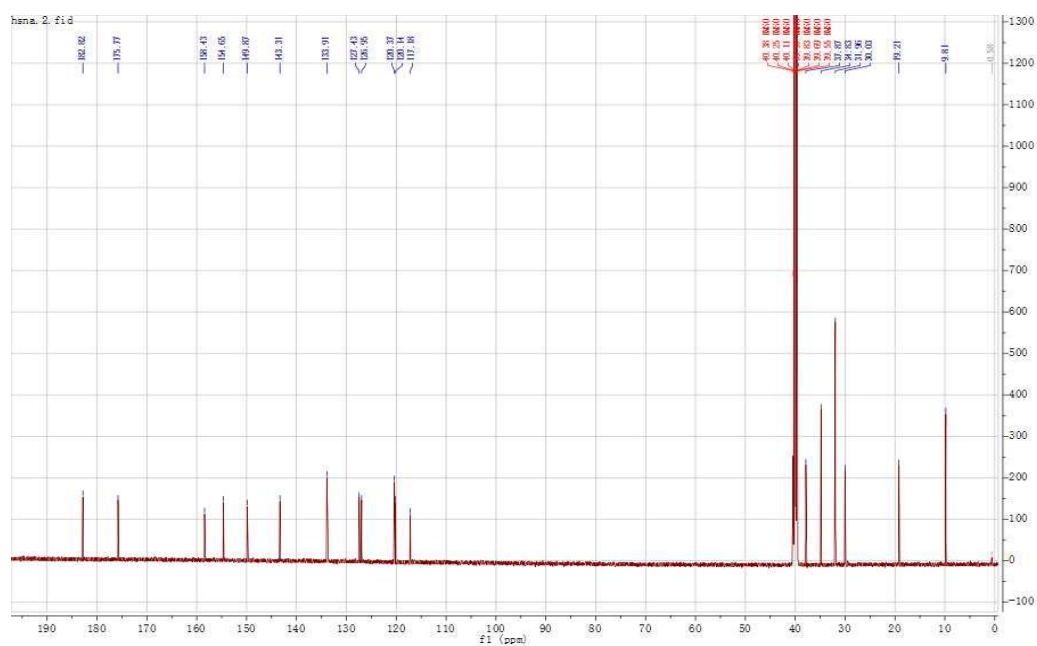

20

21 **Fig.S4.**  $^{13}\text{C}$  NMR spectral data of Sodium Tanshinone IIA Silate.

22

23

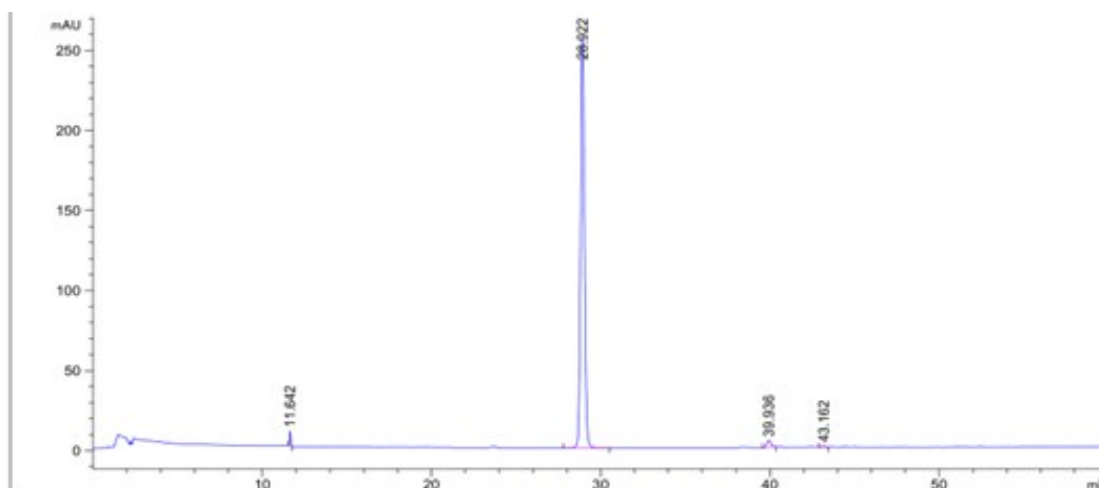

24

25 **Fig.S5.** Chromatogram of Sodium Tanshinone IIA Silate.

26 **Part2**

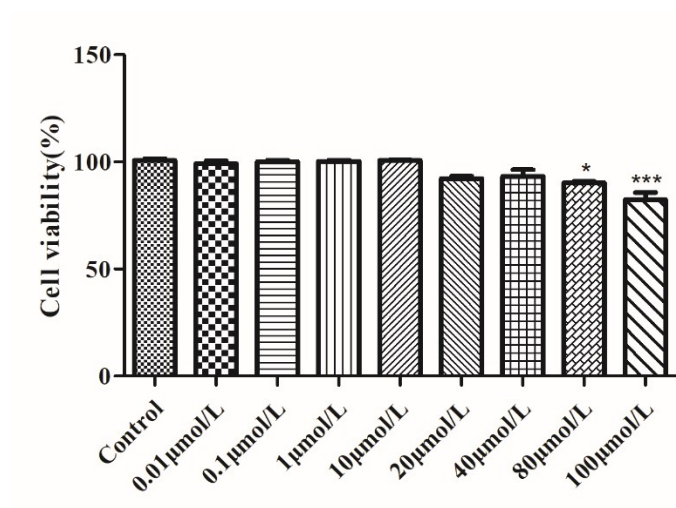

27

28 **Fig.S6.** Cell viability of STS on B16F10 cells for 48h

29
